# Supplementary material
Source: PubMed Central journal article supplement (PMC9341236)

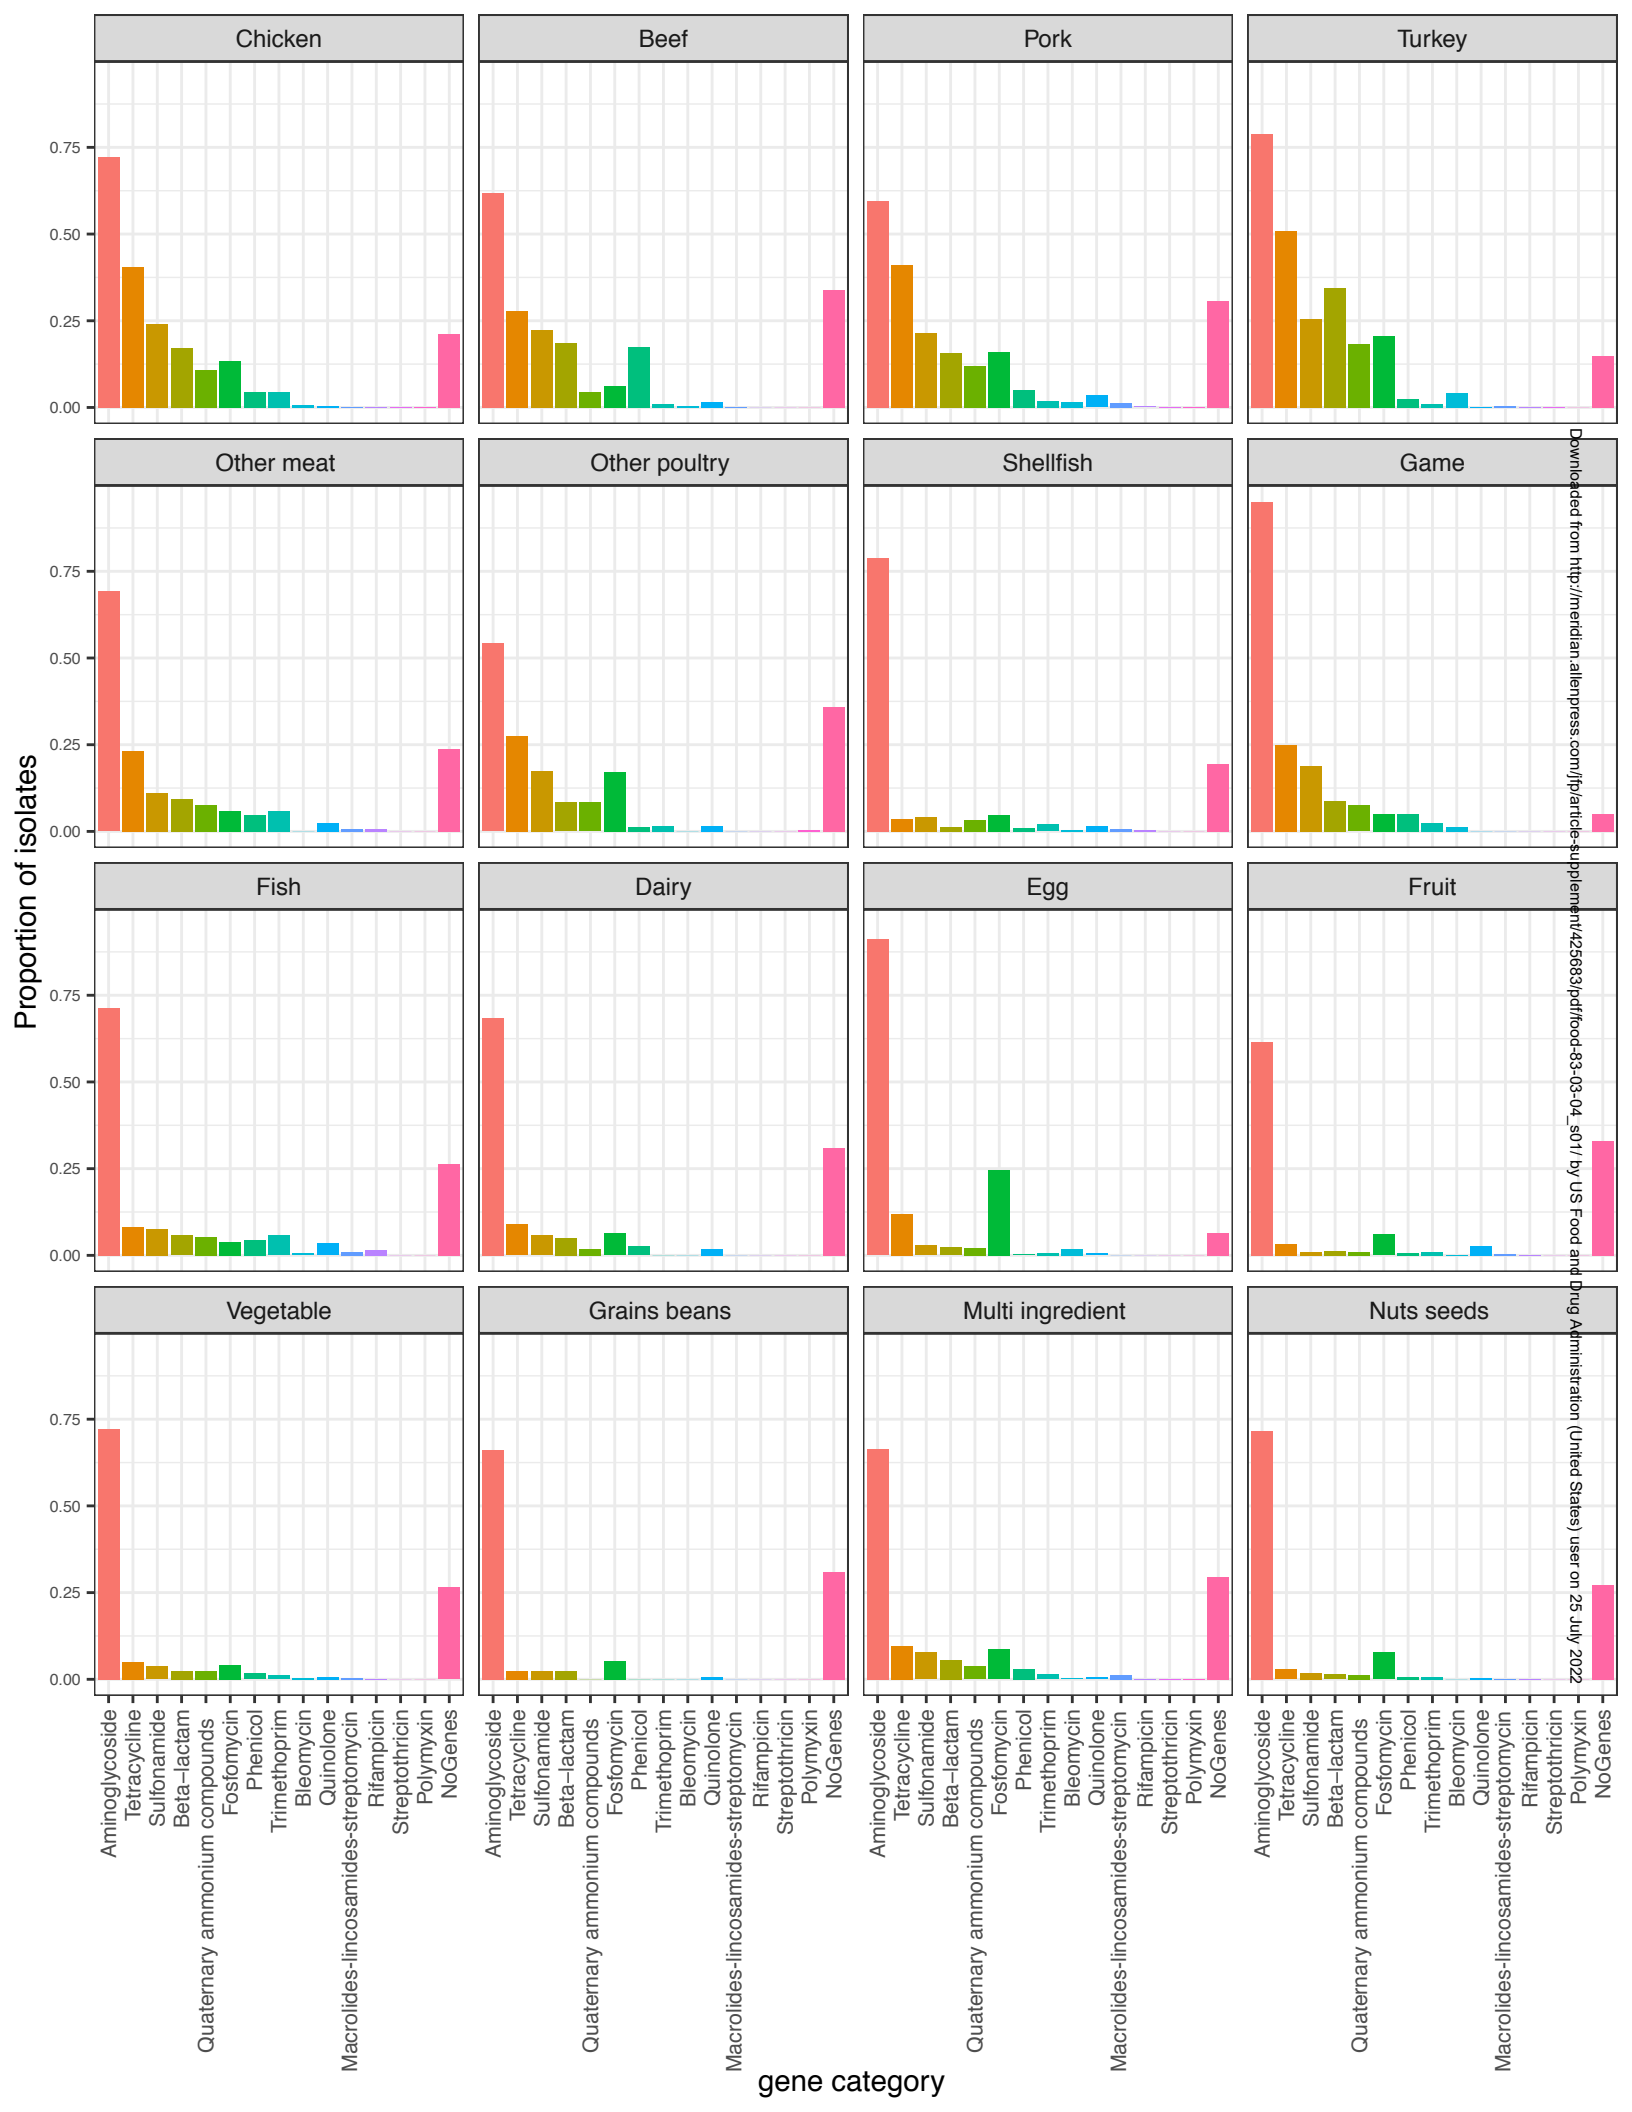

Supplement: NIHMS1823000-supplement-Supplement_1.pdf [file NIHMS1823000-supplement-Supplement_1.pdf]
